# Supplementary material for: Alkali aminoether-phenolate complexes: synthesis, structural characterization and evidence for an activated monomer ROP mechanism
Source: Royal Society of Chemistry journal article supplement (doi:10.1039/c2dt32726k), 2012-12-17

Electronic supporting information for

## Alkali aminoether-phenolate complexes: Synthesis, structural characterization and evidences for an activated monomer ROP mechanism<sup>†</sup>

Sorin C. Roşca,<sup>a</sup> Dragoş A. Roşca,<sup>a,b</sup> Vincent Dorcet,<sup>a</sup> Christopher M. Kozak,<sup>c</sup>

Francesca M. Kerton,<sup>c</sup> Jean-François Carpentier\*<sup>a</sup> and Yann Sarazin\*<sup>a</sup>

### Contents

- S1 <sup>1</sup>H NMR spectrum (0-12 ppm) of BnOH in CD<sub>2</sub>Cl<sub>2</sub> (500.13 MHz, 298 K)
- S2 <sup>1</sup>H NMR spectrum (0-12 ppm) of L-LA in CD<sub>2</sub>Cl<sub>2</sub> (500.13 MHz, 298 K)
- S3 <sup>1</sup>H NMR spectrum (0-12 ppm) of {LO<sup>3</sup>}H in CD<sub>2</sub>Cl<sub>2</sub> (500.13 MHz, 298 K)
- S4 <sup>1</sup>H NMR spectrum (0-12 ppm) of BnOLi in CD<sub>2</sub>Cl<sub>2</sub> (500.13 MHz, 298 K)
- S5 <sup>1</sup>H NMR spectrum (0-12 ppm) of {LO<sup>3</sup>}Li (**3**) in CD<sub>2</sub>Cl<sub>2</sub> (500.13 MHz, 298 K)
- S6 <sup>1</sup>H NMR spectrum (0-12 ppm) of a 1:1 mixture of BnOH and **3** in CD<sub>2</sub>Cl<sub>2</sub> (500.13 MHz, 298 K)
- S7 <sup>1</sup>H NMR spectrum (0-12 ppm) of a 5:1 mixture of BnOH and **3** in CD<sub>2</sub>Cl<sub>2</sub> (500.13 MHz, 298 K)
- S8 <sup>1</sup>H NMR spectrum (0-12 ppm) of a 1:1:1 mixture of BnOH, L-LA and **3** in CD<sub>2</sub>Cl<sub>2</sub> (500.13 MHz, 298 K) leading to the formation of **P**<sub>1</sub>
- S9 <sup>1</sup>H NMR spectrum (0-12 ppm) of a 5:5:1 mixture of BnOH, L-LA and **3** in CD<sub>2</sub>Cl<sub>2</sub> (500.13 MHz, 298 K) leading to the formation of **P**<sub>1</sub>
- S10 <sup>1</sup>H NMR spectrum (0-12 ppm) of a 1:2:1 mixture of BnOH, L-LA and **3** in CD<sub>2</sub>Cl<sub>2</sub> (500.13 MHz, 298 K) leading to the formation of **P**<sub>2</sub>
- S11 <sup>1</sup>H NMR spectrum (CDCl<sub>3</sub>, 500.13 MHz, 298 K) of a PLLA sample prepared with **3**/BnOH (from Table 2, entry 8)
- S12 VT <sup>7</sup>Li NMR for {LO<sup>3</sup>}Li·LiN(SiMe<sub>2</sub>H)<sub>2</sub> (**5**) in toluene-*d*<sub>8</sub> (258–353 K)

S1.  $^1\text{H}$  NMR spectrum (0-12 ppm) of BnOH in  $\text{CD}_2\text{Cl}_2$  (500.13 MHz, 298 K)

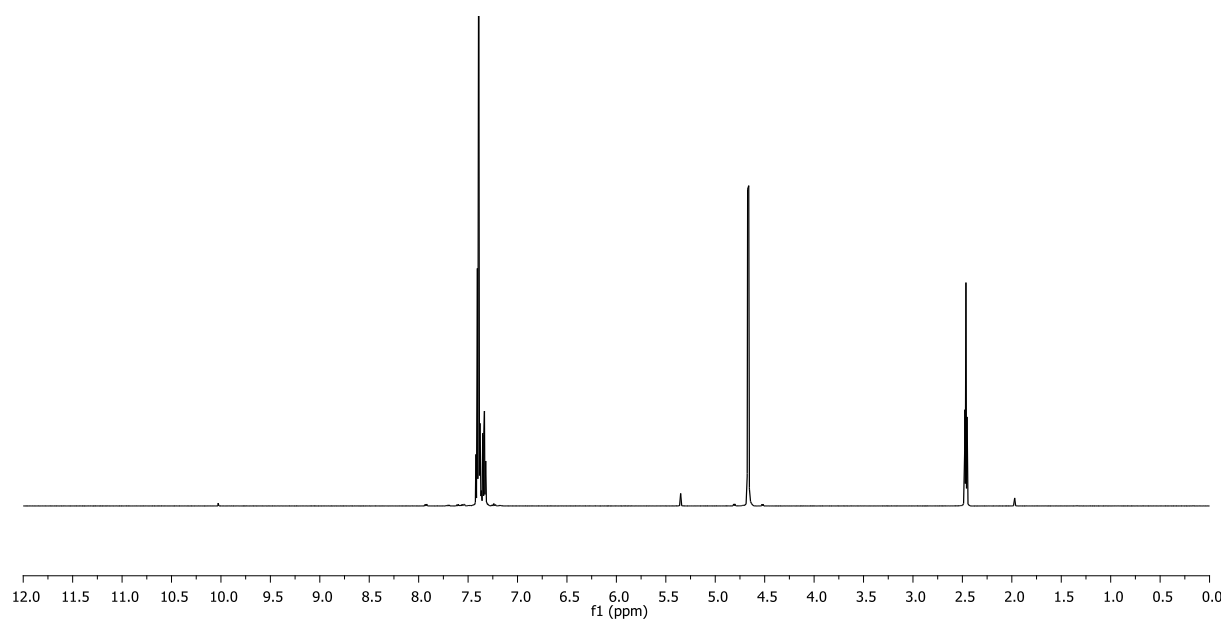

S2.  $^1\text{H}$  NMR spectrum (0-12 ppm) of L-LA in  $\text{CD}_2\text{Cl}_2$  (500.13 MHz, 298 K)

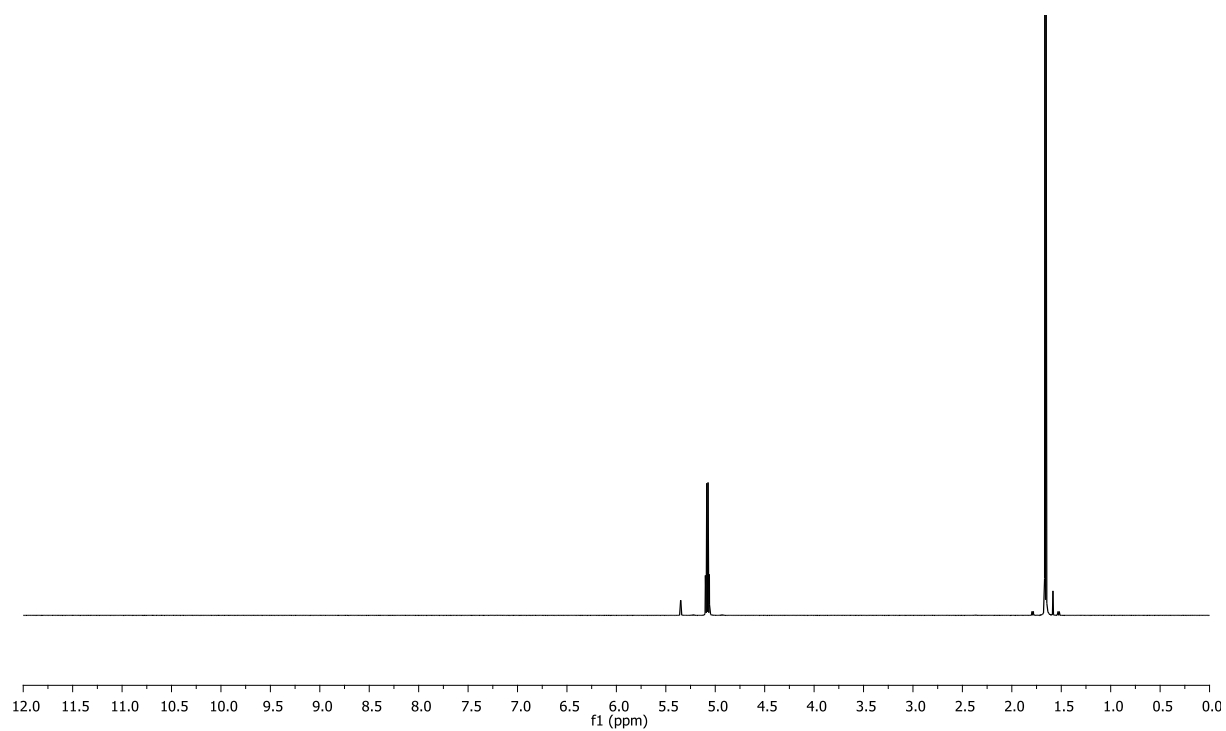

S3.  $^1\text{H}$  NMR spectrum (0-12 ppm) of  $\{\text{LO}^3\}\text{H}$  in  $\text{CD}_2\text{Cl}_2$  (500.13 MHz, 298 K)

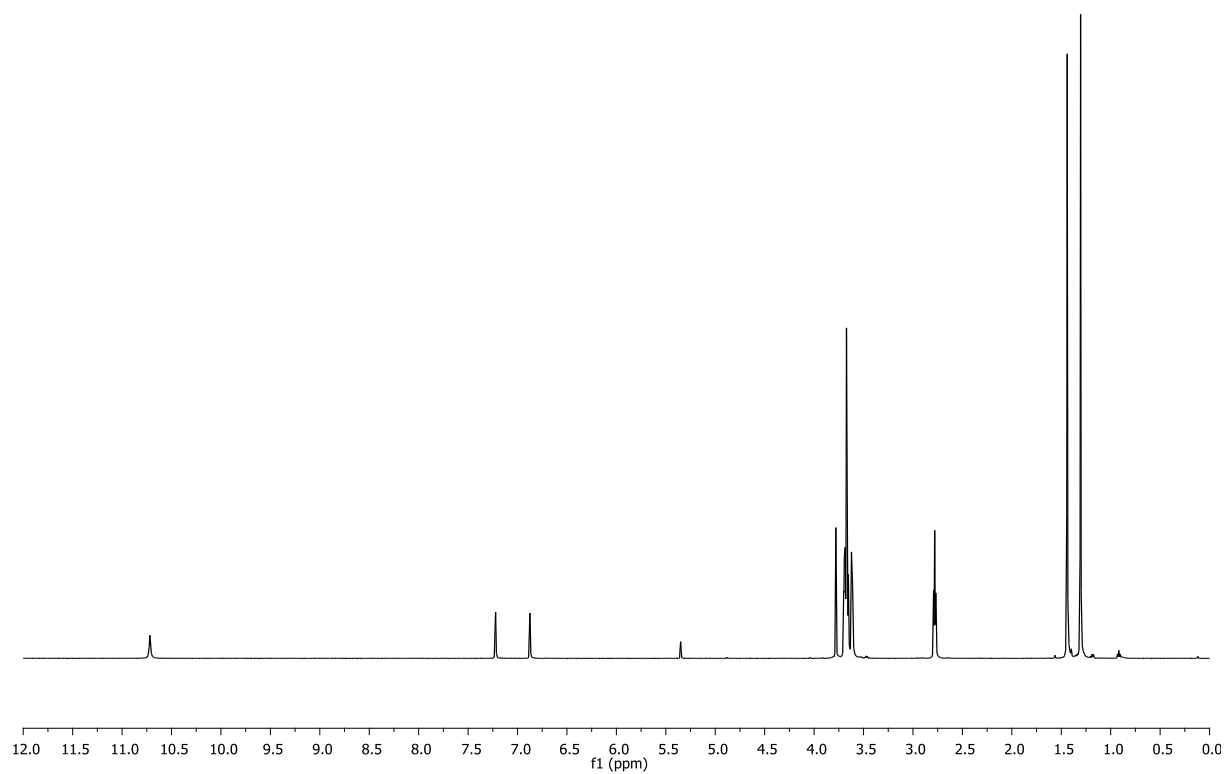

S4.  $^1\text{H}$  NMR spectrum (0-12 ppm) of  $\text{BnOLi}$  in  $\text{CD}_2\text{Cl}_2$  (500.13 MHz, 298 K)

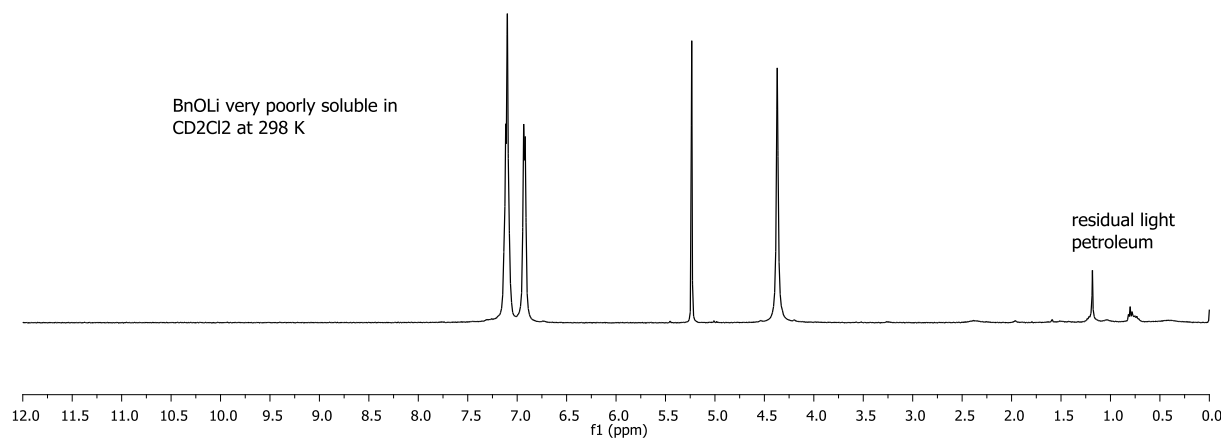

S5.  $^1\text{H}$  NMR spectrum (0-12 ppm) of  $\{\text{LO}^3\}\text{Li}$  (**3**) in  $\text{CD}_2\text{Cl}_2$  (500.13 MHz, 298 K)

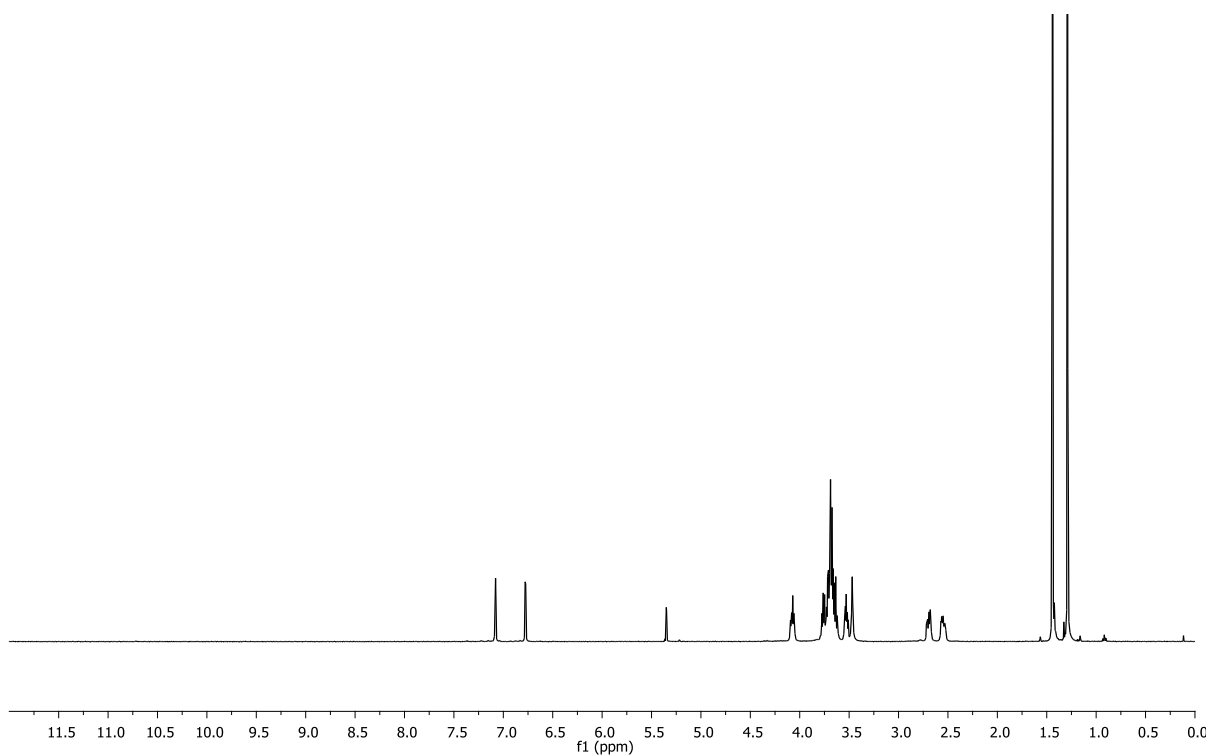

S6.  $^1\text{H}$  NMR spectrum (0-12 ppm) of a 1:1 mixture of  $\text{BnOH}$  and **3** in  $\text{CD}_2\text{Cl}_2$  (500.13 MHz, 298 K)

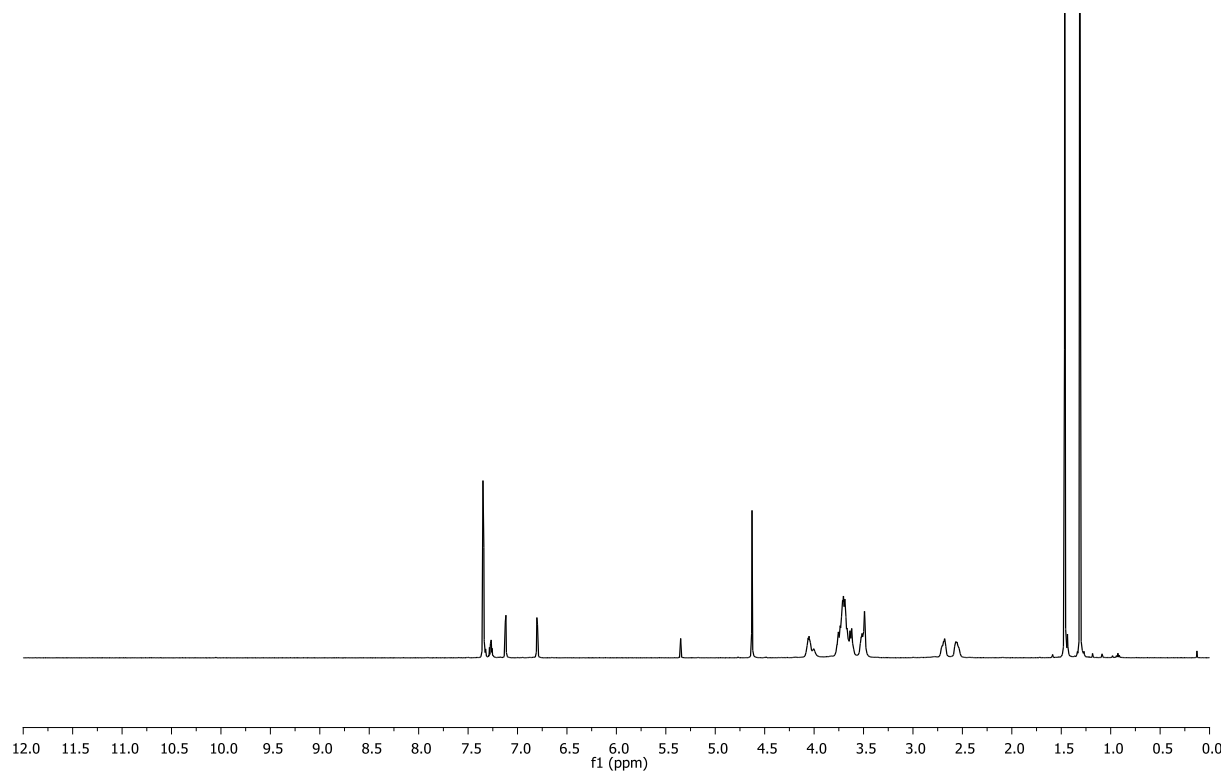

S7.  $^1\text{H}$  NMR spectrum (0-12 ppm) of a 5:1 mixture of BnOH and **3** in  $\text{CD}_2\text{Cl}_2$  (500.13 MHz, 298 K)

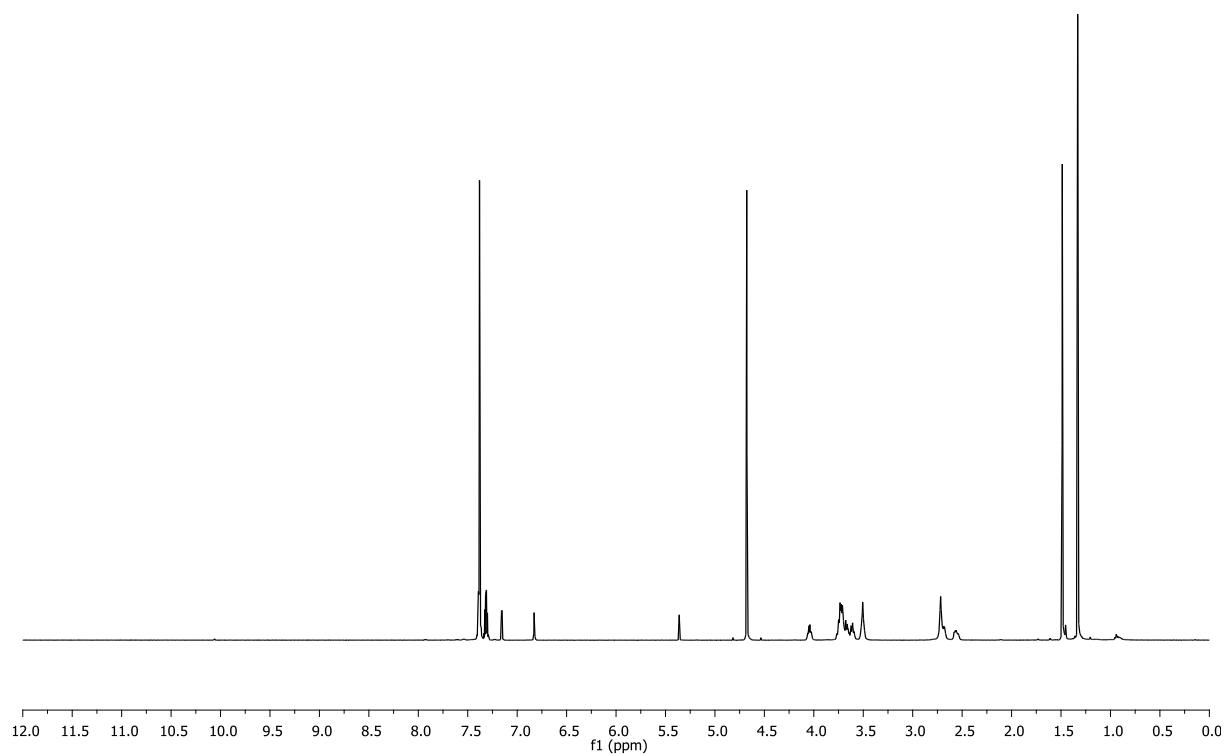

S8.  $^1\text{H}$  NMR spectrum (0-12 ppm) of a 1:1:1 mixture of BnOH, L-LA and **3** in  $\text{CD}_2\text{Cl}_2$  (500.13 MHz, 298 K) leading to the formation of **P<sub>1</sub>**

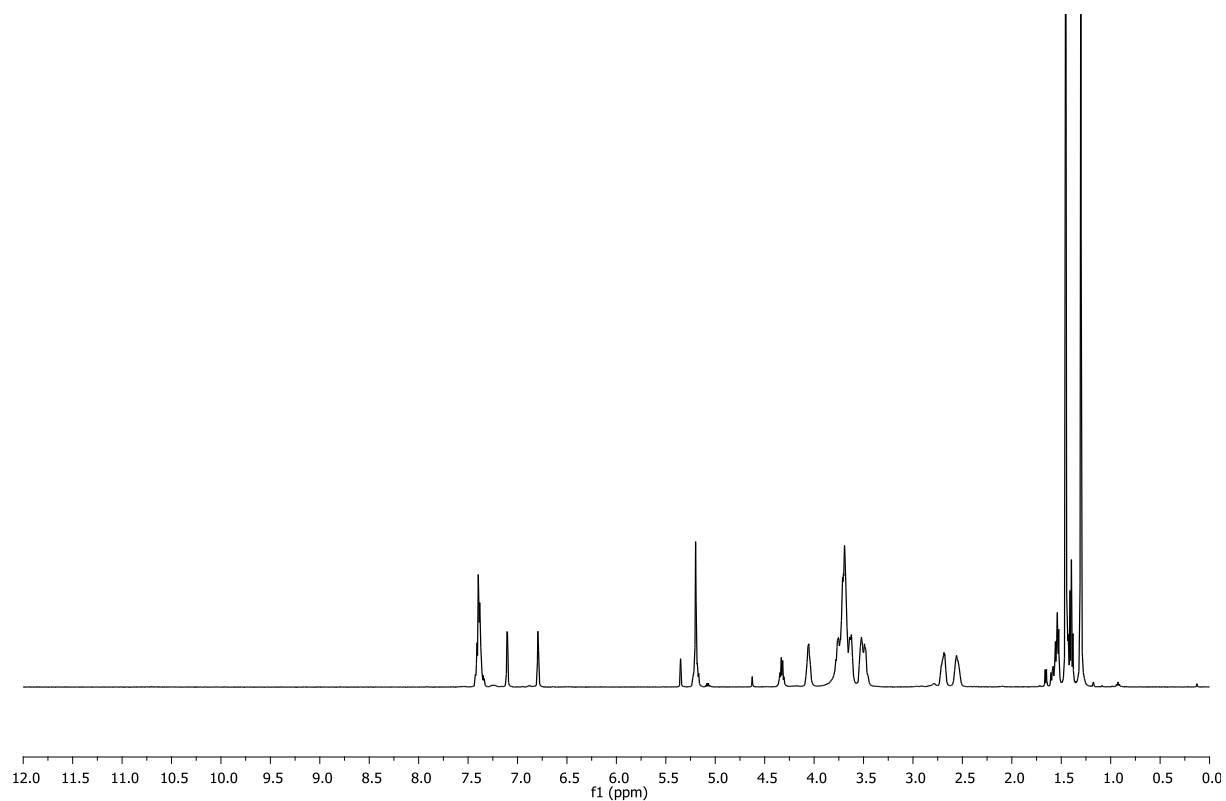

S9.  $^1\text{H}$  NMR spectrum (0-12 ppm) of a 5:5:1 mixture of BnOH, L-LA and **3** in  $\text{CD}_2\text{Cl}_2$  (500.13 MHz, 298 K) leading to the formation of **P**<sub>1</sub>

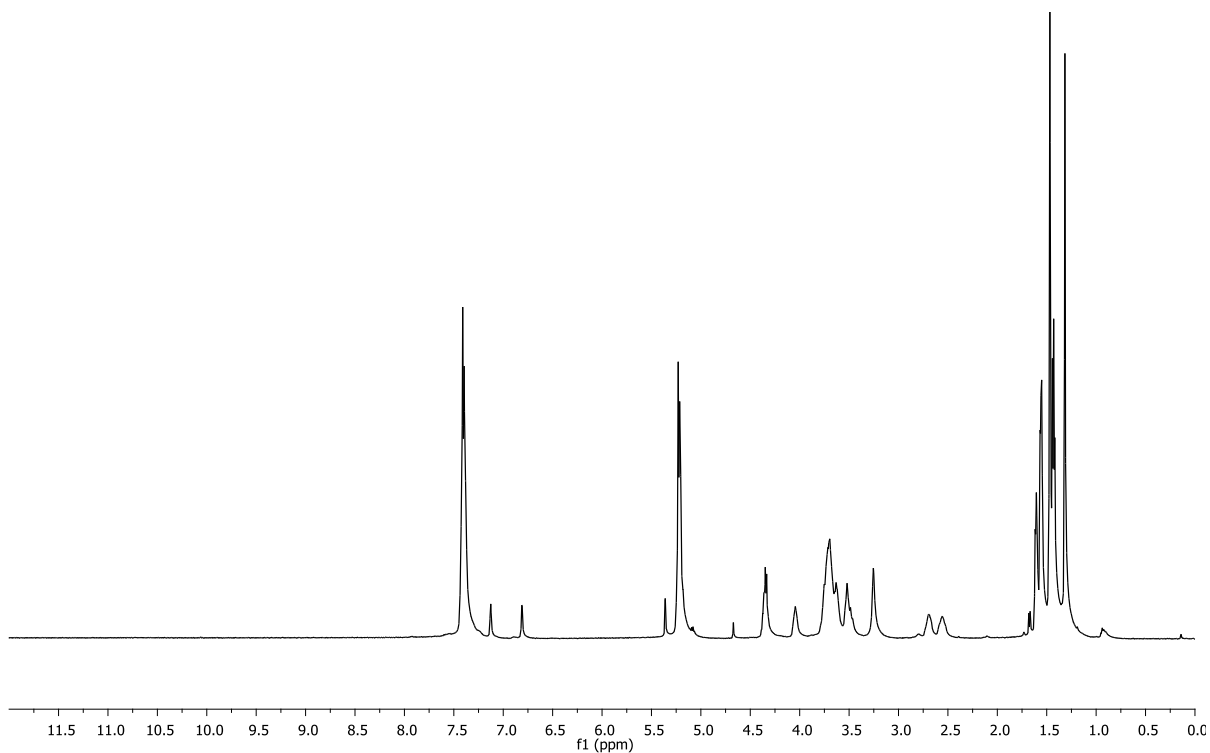

S10.  $^1\text{H}$  NMR spectrum (0-12 ppm) of a 1:2:1 mixture of BnOH, L-LA and **3** in  $\text{CD}_2\text{Cl}_2$  (500.13 MHz, 298 K) leading to the formation of **P**<sub>2</sub>

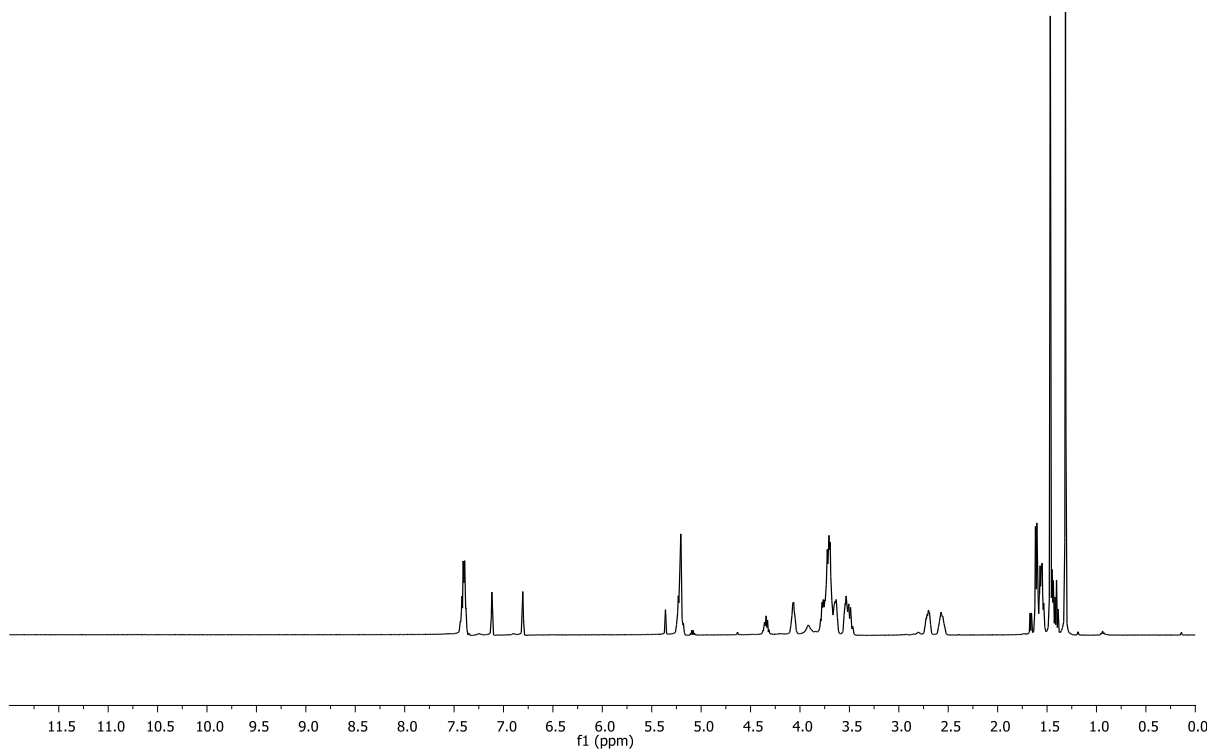

S11.  $^1\text{H}$  NMR spectrum ( $\text{CDCl}_3$ , 500.13 MHz, 298 K) of a PLLA sample prepared with **3**/BnOH (from Table 2, entry 8)

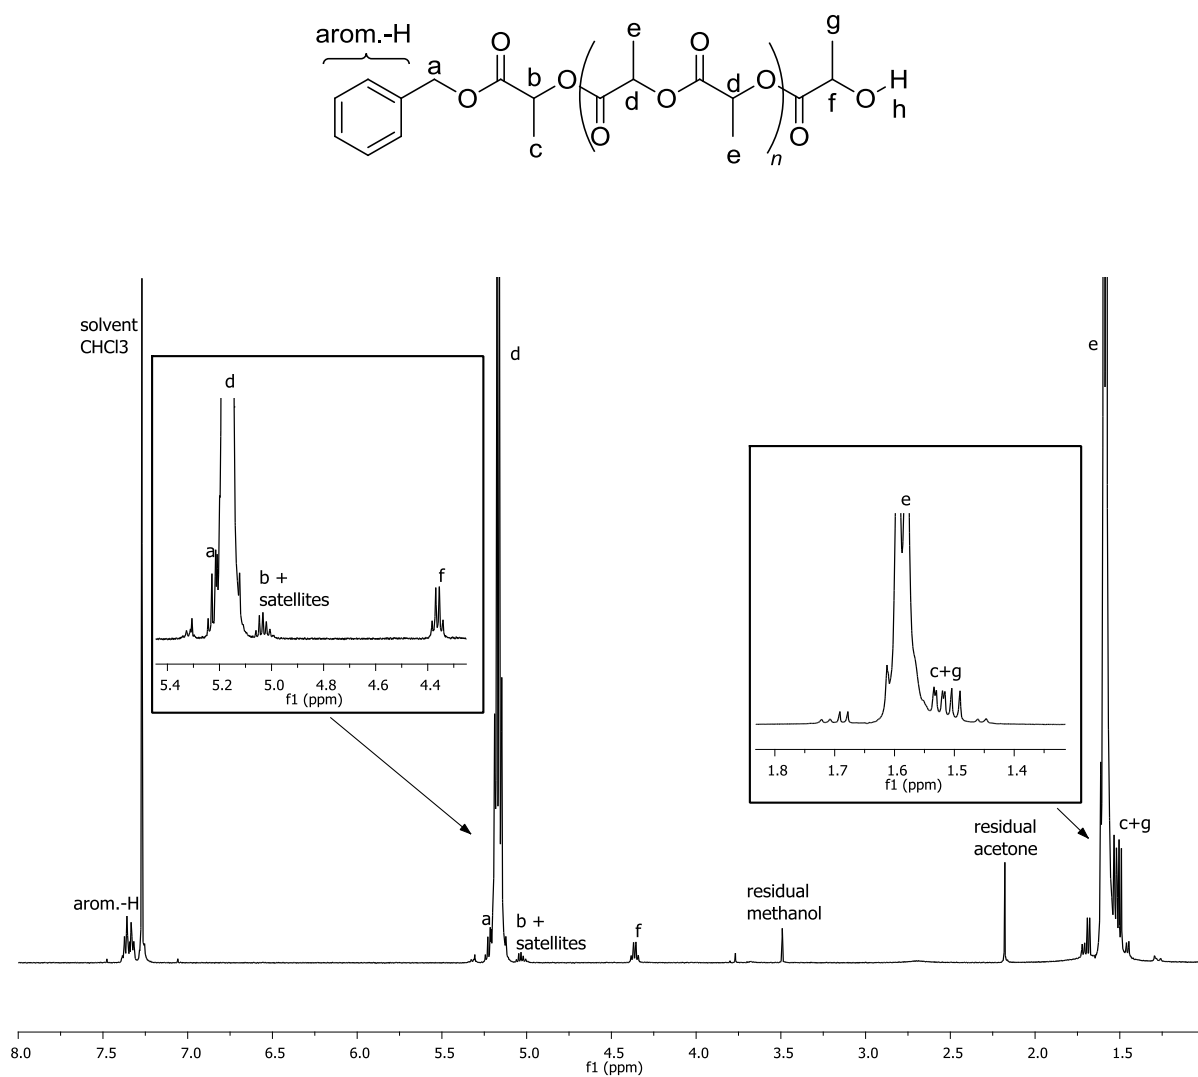

S12 VT  $^7\text{Li}$  NMR for  $\{\text{LO}^3\}\text{Li}\cdot\text{LiN}(\text{SiMe}_2\text{H})_2$  (**5**) in toluene- $d_8$  (258–353 K)

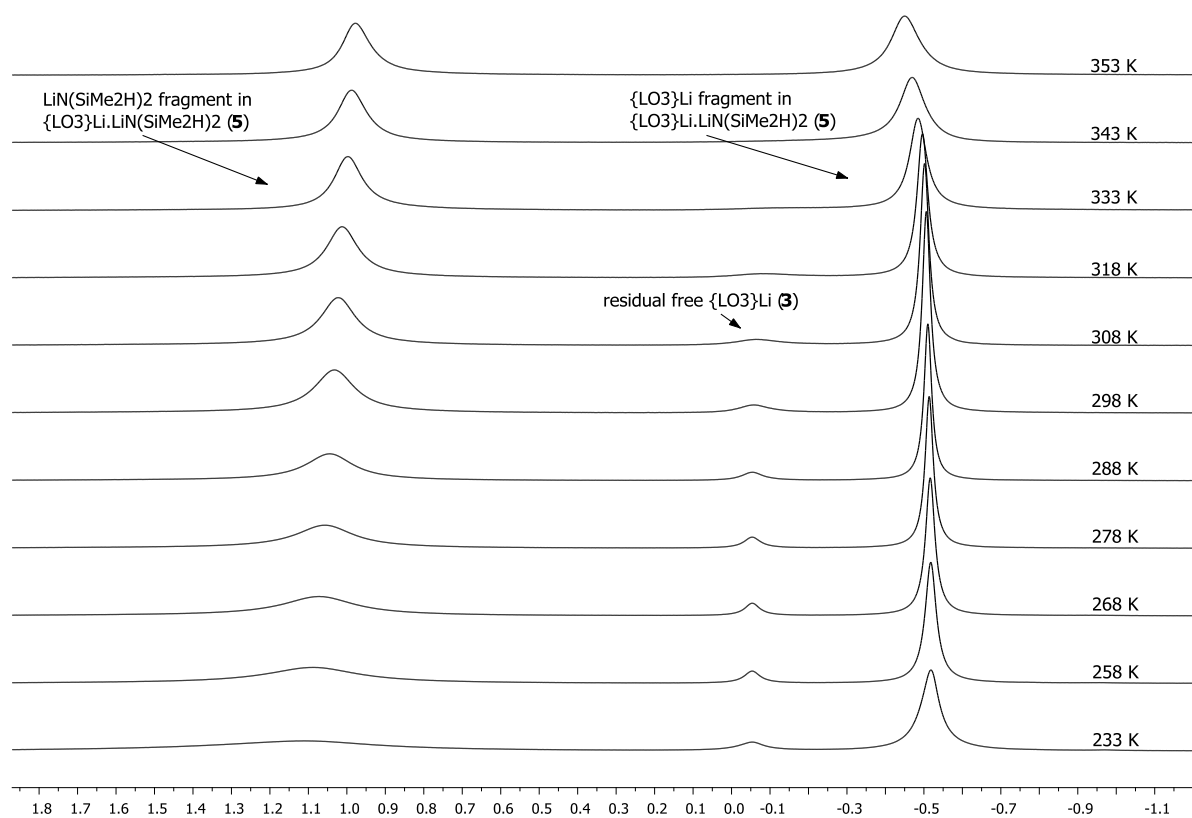

Supplement: c2dt32726k.pdf [file c2dt32726k.pdf]
